# Supplementary material for: Macrophages and nociceptor neurons form a sentinel unit around fenestrated capillaries to defend the synovium from circulating immune challenge
Source: PubMed Central journal article supplement (PMC11588661; doi:10.1038/s41590-024-02011-8), 2024-11-25
Supplement: 41590_2024_2011_MOESM1_ESM.pdf [file 41590_2024_2011_MOESM1_ESM.pdf]

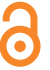

---

# **Macrophages and nociceptor neurons form a sentinel unit around fenestrated capillaries to defend the synovium from circulating immune challenge**

---

In the format provided by the authors and unedited

**Table S1**

| Reagent or resource                                   | Source     | Identifier/ dilution                                |
|-------------------------------------------------------|------------|-----------------------------------------------------|
| <b>Antibodies</b>                                     |            |                                                     |
| Rat anti-CD16/32                                      | Biologend  | Cat# 156604, Lot# B293349, Clone S17011E, 1/50      |
| Pacific Blue-conjugated rat anti-I-A/I-E              | Biologend  | Cat# 107620, Lot#B252427, Clone M5/114.15.2, 1/100  |
| eFluor450-conjugated rat anti-CD3e                    | Invitrogen | Cat#48-0031-82, Lot#2102873, Clone 145-2C11, 1/100  |
| FITC-conjugated rat anti-CD11b                        | Biologend  | Cat# 101206, Lot#B286843, Clone M1/70, 1/100        |
| AF488-conjugated rat anti-panendothelial cell antigen | Biologend  | Cat# 120506, Lot#B277044, Clone MECA-32, 1/100      |
| AF488-conjugated mouse anti-tubulin $\beta$ 3         | Biologend  | Cat#801203, Lot#B332149, Clone TUJ1, 1/100          |
| AF488-conjugated rat anti-CD68                        | Biologend  | Cat# 137012, Lot# B272230, Clone FA-11, 1/50        |
| AF488-conjugated rat anti-CD31                        | Biologend  | Cat# 102514, Lot# B282351, Clone MEC13.3, 1/100     |
| AF488-conjugated rat anti-I-A/I-E                     | Biologend  | Cat# 107616, Lot# B343353, Clone M5/114.15.2, 1/100 |
| PerCP-Cyanine5.5-conjugated rat anti-Ly6C             | Invitrogen | Cat# 45-5932-82, Lot#2162018, Clone HK1.4, 1/200    |
| PerCP-Cyanine5.5-conjugated rat anti-CD206            | Biologend  | Cat# 141716, Lot# B270129, Clone C068C2, 1/100      |
| PE-conjugated rat anti-Tim-4                          | Biologend  | Cat# 130005, Lot# B283682, Clone RMT4-54, 1/100     |
| PE-conjugated Armenian hamster anti-CD11c             | Biologend  | Cat# 117308, Lot# B202498, Clone N418, 1/100        |
| PE-conjugated Syrian hamster anti-podoplanin          | Biologend  | Cat# 127407, Lot# B328276, Clone 8.1.1, 1/100       |

|                                              |               |                                                              |
|----------------------------------------------|---------------|--------------------------------------------------------------|
| PE-conjugated mouse anti-CD32b               | Invitrogen    | Cat# 12-0321-82,<br>Lot# 2157123,<br>Clone AT130-2,<br>1/100 |
| PE-conjugated Armenian hamster anti-CD16.2   | Biologend     | Cat# 149503, Lot#<br>B273077, Clone<br>9E9, 1/100            |
| PE-conjugated rat anti-Lyve1                 | R&D systems   | Cat# FAB2125P,<br>Lot#<br>ACFE0220031,<br>Polyclonal, 1/100  |
| PE-Cyanine7-conjugated rat anti-Lyve1        | Invitrogen    | Cat# 25-0443-80,<br>Lot# 2343412,<br>Clone ALY7, 1/200       |
| PE-Cyanine7-conjugated rat anti-F4/80        | Invitrogen    | Cat# 25-4801-82,<br>Lot# 2279168,<br>Clone BM8, 1/100        |
| PE-Cyanine7-conjugated rat anti-CD206 (MMR)  | Invitrogen    | Cat# 25-2061-82,<br>Lot# 2062662,<br>Clone MR6F3,<br>1/100   |
| eFluor660-conjugated rat anti-Lyve1          | Invitrogen    | Cat# 50-0443-82,<br>Lot# 2205461,<br>Clone ALY7, 1/100       |
| APC-conjugated rat anti-Ly6C                 | Invitrogen    | Cat# 17-5932-82,<br>Lot# 2002701,<br>Clone HK1.4,<br>1/200   |
| APC-conjugated rat anti-CD16                 | Biologend     | Cat# 158005, Lot#<br>B311445, Clone<br>S17014E, 1/100        |
| APC-conjugated mouse anti-CD64               | Biologend     | Cat# 139306, Lot#<br>B277148, Clone<br>X54-5/7.1, 1/100      |
| APC-conjugated mouse anti-CD32b              | Invitrogen    | Cat# 17-0321-80,<br>Lot# 2036645,<br>Clone AT130-2,<br>1/100 |
| APC-eFluor780-conjugated rat anti-Gr-1       | Invitrogen    | Cat# 47-5931-82,<br>Lot# 2320762,<br>Clone RB6-8C5,<br>1/100 |
| AF594-conjugated rat anti-CD31               | Biologend     | Cat# 102520, Lot#<br>B368931, Clone<br>MEC13.3, 1/100        |
| AF647-conjugated rat anti-CD31               | Biologend     | Cat# 102516, Lot#<br>B308659, Clone<br>MEC13.3, 1/100        |
| AF647-conjugated Armenian hamster anti-CD11c | Biologend     | Cat# 117312, Lot#<br>B341497, Clone<br>N418, 1/100           |
| AF647-conjugated rat anti-B220               | BD Pharmingen | Cat# 557683, Lot#<br>9123764, Clone<br>RA3-6B2, 1/100        |

|                                                             |                        |                                                          |
|-------------------------------------------------------------|------------------------|----------------------------------------------------------|
| AF647-conjugated rat anti-ER-TR7                            | Novus Biologicals      | Cat# NB100-64932AF647, Lot# D102142, Clone ER-TR7, 1/100 |
| APC-Cy7-conjugated rat anti-Ly6G                            | BD Pharmingen          | Cat# 560600, Lot# 8277987, Clone 1A8, 1/100              |
| Brilliant Violet421-conjugated rat anti-F4/80               | Biolegend              | Cat# 123131, Lot# B258771, Clone BM8, 1/100              |
| Brilliant Violet605-conjugated rat anti-I-A/I-E             | Biolegend              | Cat# 107639, Lot# B293222, Clone M5/114.15.2, 1/100      |
| Brilliant Violet650-conjugated mouse anti-CX3CR1            | Biolegend              | Cat# 149033, Lot# B301229, Clone SA011F11, 1/100         |
| Goat anti-CGRP                                              | Abcam                  | Cat# ab36001, Lot# GR3445403-5, Polyclonal, 1/200        |
| Rabbit anti-tyrosine hydroxylase                            | Abcam                  | Cat# ab112, Lot# GR3435522-1, Polyclonal, 1/200          |
| Rabbit anti-tub $\beta$ 3                                   | Abcam                  | Cat# ab18207, Lot# GR3257458-1, polyclonal, 1/200        |
| Biotin-conjugated mouse anti- Ea52-68 peptide bound to I-Ab | Invitrogen             | Cat# 13-5741-82, Lot# 1947272, Clone YAc, 1/100          |
| Guinea pig anti-NP2                                         | In house               | NA                                                       |
| AF488-conjugated mouse anti-alpha smooth muscle actin       | Abcam                  | Cat# AB184675, Lot# 1040301-1, Clone 1A4, 1/100          |
| AF594-conjugated donkey anti-guinea Pig                     | Jackson ImmunoResearch | Cat# 706-585-148, Polyclonal, 1/200                      |
| AF594-conjugated mouse anti-CD31                            | Biolegend              | Cat# 303126, Lot# B297139, Clone WN59, 1/100             |
| AF647-conjugated mouse anti-CD55                            | Novus Biologicals      | Cat# NBP2-47964AF647, Lot# D105865, Clone 143-30, 1/100  |
| AF647-conjugated mouse anti-HLA-DR                          | Abcam                  | Cat# ab223907, Lot# GR3441855-1, Clone TAL1B5, 1/100     |
| Goat anti-CD32B                                             | Abcam                  | Cat# AB77093, Lot# 1034248-3, Polyclonal, 1/100          |
| Goat anti-LYVE1                                             | R&D systems            | Cat# AF2089, Lot# KPY0119121, Polyclonal, 1/100          |

|                                          |                   |                                                    |
|------------------------------------------|-------------------|----------------------------------------------------|
| Rabbit anti-PLVAP                        | Novus Biologicals | Cat# NBP1-83911, Lot# 000007304, Polyclonal, 1/100 |
| Rabbit anti-LYVE1                        | Abcam             | Cat# ab33682, Lot# GR295168-4, polyclonal, 1/100   |
| PE/Dazzle594-conjugated mouse anti-CD206 | Biolegend         | Cat# 321130, Lot# B271255, Clone 15-2, 1/100       |
|                                          |                   |                                                    |
| Anti-mouse CSF1R (CD115)                 | Biocell           | Cat# BE0213, Lot# 808022M2, Clone AFS98            |
| Anti-mouse TNF $\alpha$                  | Biocell           | Cat# BE0058, Lot# 728222J1, Clone XT3.11           |
| Anti-mouse CXCL1                         | R&D systems       | Cat# MAB453, Lot#AOS0823041, Clone 48415           |
| Anti-mouse IL-1 $\beta$                  | Invivogen         | Cat# mil1b-mab9-02, Lot# 10594-44-01               |
| Rat IgG2a isotype control                | Biocell           | Cat#BE0089, Lot# 849322J2, Clone 2A3               |
|                                          |                   |                                                    |

### **Chemicals, peptides, and recombinant proteins**

|                                                                                                 |                                 |                  |
|-------------------------------------------------------------------------------------------------|---------------------------------|------------------|
| Glyoxal                                                                                         | Sigma-Aldrich                   | Cat# 128465      |
| Antigenfix                                                                                      | Diapath                         | Cat# P0016       |
| Reagent diluent concentrate 2                                                                   | R&D systems                     | Cat# DY995       |
| Saponin                                                                                         | Sigma                           | Cat# SAE0073     |
| Neurobasal medium                                                                               | Thermo Scientific               | Cat# 10888022    |
| Glutamax Supplement                                                                             | Gibco                           | Cat# 35050061    |
| B-27 supplement (50x)                                                                           | Gibco                           | Cat# 17504044    |
| NGF 2.5S                                                                                        | Gibco                           | Cat# 13257-019   |
| Collagenase, type1, powder                                                                      | Thermo Scientific               | Cat# 17100017    |
| E $\alpha$ (52–68) peptide                                                                      | Anaspec                         | Cat# AS-61621    |
| Dextran, Texas Red™, 70,000 MW                                                                  | Invitrogen                      | Cat# D1864       |
| Dextran, Fluorescein, 2,000,000 MW                                                              | Invitrogen                      | Cat# D7137       |
| Fluospheres™ Carboxylate-Modified Microspheres, 0.2 $\mu$ m, orange fluorescent (540/560)       | Thermo Scientific               | Cat# F8809       |
| Fluospheres™ Carboxylate-Modified Microspheres, 2.0 $\mu$ m, yellow-green fluorescent (505/515) | Thermo Scientific               | Cat# F8827       |
| Fluospheres™ Carboxylate-Modified Microspheres, 0.04 $\mu$ m, dark red fluorescent (660/680)    | Thermo Scientific               | Cat# F8789       |
| CGRP (mouse, rat)                                                                               | Cambridge Research Biochemicals | Cat# crb1000889h |
| BIBN 4096                                                                                       | Tocris                          | Cat# 4561        |
| Diclofenac sodium salt                                                                          | Sigma-Aldrich                   | Cat# D6899       |
| A438079 hydrochloride                                                                           | Tocris                          | Cat# 2972        |
|                                                                                                 |                                 |                  |

### **Commercial assays**

|                                                               |                      |               |
|---------------------------------------------------------------|----------------------|---------------|
| Mouse CGRP ELISA kit                                          | Antibodies.com       | Cat# A76318   |
| Ce3D Tissue Clearing kit                                      | Biolegend            | Cat# 427701   |
| SMARTer® Stranded Total RNA-Seq Kit v3 - Pico Input Mammalian | Takara Bio           | Cat#634485    |
| Mouse CXCL1/KC DuoSet ELISA                                   | R&D systems          | Cat# DY453-05 |
| Mouse CXCL2/MIP-2 DuoSet ELISA                                | R&D systems          | Cat# DY452-05 |
| <b>Software and algorithms</b>                                |                      |               |
| Imaris                                                        | Version 9.9.1        |               |
| FlowJo                                                        | Version 10.6.2       |               |
| ImageJ2                                                       | Version 2.14.0/1.54f |               |
| QuPath                                                        | Version 0.3.2        |               |
